# Supplementary material for: Nano dispersion of 3D Cd(ii) coordination polymer: synthetic blood plasma anticoagulant
Source: Royal Society of Chemistry journal article supplement (doi:10.1039/c3qi00013c), 2014-01-01
Supplement: c3qi00013c.pdf [file c3qi00013c.pdf]

## Supporting Information

### Nano Dispersion of 3D Cd(II) Co-ordination Polymer: Synthetic Blood Plasma Anticoagulant

Darsi Rambabu, Chullikkattil P. Pradeep, Abhimanew Dhir\*

Indian Institute of Technology, Mandi, Himachal Pradesh, INDIA

- S2.** Materials, Instrumentation and X ray details
- S3.** Experimental for synthesis of **RAM 1**
- S4.** Crystal data and structure refinement parameters for **RAM 1**
- S5.** Selected bond lengths (Å) and angles (°) for **RAM 1**
- S6.** Asymmetric unit of **RAM 1**
- S7.** Basic 3D building unit of **RAM 1**
- S8.** 3D framework (view along *c* axis and quinoline have been omitted) of **RAM 1**.
- S9.** 3D framework of **RAM 1** (view along *b* axis).
- S10.** Thermo gravimetric curve of **RAM 1**.
- S11.** Powder X –ray diffraction of **RAM 1** and **DRAM 1**.
- S12.** IR spectrum of **RAM 1** and **DRAM 1**.
- S13.** UV-vis absorption spectra of **DRAM 1** on addition of **TP** (225 µl).
- S14.** Fluorescence emission spectra of **DRAM 1** on addition of **HSA**.

**Materials and instrumentation:** All chemicals and reagents were purchased from Sigma Aldrich. The IR spectral studies were performed on Perkin Elmer FT-IR spectrometer using KBr pellets. Fluorescence studies were carried on Agilent Technologies Cary Eclipse fluorescence spectrophotometer. U.V studies were carried on SHIMADZU UV-2450 spectrophotometer using quartz cuvettes. Single crystal X-ray diffraction (SXRD) data was collected on dual core Agilent Technologies Super Nova CCD system. Powder X-ray diffraction (PXRD) data were collected on Rigaku SmartLab 9 KW rotating anode Powder X-ray Diffractometer at room temperature. The thermogravimetric analysis was carried out using The Mettler Toledo thermal analyzer in N<sub>2</sub> atmosphere at a heating rate of 10 °C/ min. TEM images collected on SEI TECNAI F20 HRTEM (high resolution transmission electron microscope). SEM images were taken on SEI 15KV SEM (scanning electron microscope) instrument.

**X-ray crystallography details.** Single crystal X-ray structural studies of **RAM 1** were performed on a CCD Agilent Technologies (Oxford Diffraction) SUPER NOVA diffractometer. Data were collected at 150(2) K using graphite-monochromated Mo K $\alpha$  radiation ( $\lambda_{\alpha} = 0.71073 \text{ \AA}$ ). The strategy for the Data collection was evaluated by using the CrysAlisPro CCD software. The data were collected by the standard  $\phi$ - $\omega$  scan techniques, and were scaled and reduced using CrysAlisPro RED software. The structure was solved by direct methods using SHELXS-97 and refined by full matrix least-squares with SHELXL-97, refining on  $F^2$ .<sup>1</sup>

The positions of all the non-hydrogen atoms were obtained by direct methods and were refined anisotropically. The hydrogen atoms were placed in geometrically constrained positions and refined with isotropic temperature factors, generally  $1.2U_{eq}$  of their parent atoms. The crystal and refinement data are summarized in **Table 1**, and selected bond distances and bond angles are shown in **Table 2**.

- (1) Sheldrick, G. M. *Acta Crystallogr., Sect. A* **2008**, *A64*, 112-122. *Program for Crystal Structure Solution and Refinement*; University of Goettingen: Goettingen, Germany, 1997.

### Experimental for synthesis of RAM 1

Synthesis of  $\{[\text{Cd}(\text{NDC})(\text{QN})]\}_n$  (**RAM 1**): A mixture of 0.085 g (0.46 mmol)  $\text{CdCl}_2$ , 0.050 g (0.23 mmol) of 2,6- $\text{H}_2\text{NDC}$ , 110  $\mu\text{l}$  (0.92 mmol) of QN, and 4 ml of DMF was placed in Parr's acid digestion bomb and then heated in an oven at 125°C for 24 h. The mixture was allowed to cool at room temperature for 12 h to obtain cream colored crystals (0.057 g, yield 27.2% ) which were washed with DMF (3×1 ml) and dried under vacuum at room temperature.

**Table 1** Crystal data and structure refinement parameters for **RAM 1**

|                                                               |                                                             |
|---------------------------------------------------------------|-------------------------------------------------------------|
| Empirical formula                                             | C <sub>21</sub> H <sub>13</sub> CdNO <sub>4</sub>           |
| Formula weight                                                | 455.72                                                      |
| Temperature (K)                                               | 150(2)                                                      |
| Crystal size (mm)                                             | 0.23 x 0.18 x 0.13                                          |
| Wavelength (Å)                                                | 0.71073                                                     |
| Crystal system                                                | Triclinic                                                   |
| Space group                                                   | P -1                                                        |
| <i>a</i> (Å)                                                  | 7.858(5)                                                    |
| <i>b</i> (Å)                                                  | 10.508(5)                                                   |
| <i>c</i> (Å)                                                  | 11.554(5)                                                   |
| $\alpha$ (°)                                                  | 112.221(5)                                                  |
| $\beta$ (°)                                                   | 95.625(5)                                                   |
| $\gamma$ (°)                                                  | 105.097(5)                                                  |
| Z                                                             | 2                                                           |
| Volume (Å <sup>3</sup> )                                      | 831.8(8)                                                    |
| Density (Mg m <sup>-3</sup> )                                 | 1.819                                                       |
| Absorption coefficient (mm <sup>-1</sup> )                    | 1.341                                                       |
| F(000)                                                        | 452                                                         |
| $\theta$ range for data collection (°)                        | 3.00 to 25.00 deg.                                          |
| Limiting indices                                              | -9<= <i>h</i> <=9, -12<= <i>k</i> <=12, -13<= <i>l</i> <=13 |
| Reflections collected / unique                                | 4423 / 4423                                                 |
| R(int)                                                        | 0.0000                                                      |
| Absorption correction                                         | Semi-empirical from equivalents                             |
| Max. and min. transmission                                    | 0.8449 and 0.7478                                           |
| Refinement method                                             | Full-matrix least-squares on <i>F</i> <sup>2</sup>          |
| Data / restraints / parameters                                | 4423 / 0 / 244                                              |
| Goodness-of-fit on <i>F</i> <sup>2</sup>                      | 1.070                                                       |
| Final R indices [ <i>I</i> >2 <i>s</i> $\sigma$ ( <i>I</i> )] | R1 = 0.0506, wR2 = 0.1341                                   |
| R indices (all data)                                          | R1 = 0.0539, wR2 = 0.1371                                   |
| Largest diff. peak and hole (e.Å <sup>-3</sup> )              | 1.259 and -0.963                                            |

**Table 2** Selected bond lengths (Å) and angles (°) for **RAM 1**

|                     |            |                      |            |
|---------------------|------------|----------------------|------------|
| Cd(1)-O(1)          | 2.262(4)   | Cd(1)-O(2)#1         | 2.551(4)   |
| Cd(1)-N(1)          | 2.266(5)   | Cd(1)-O(3)#2         | 2.588(4)   |
| Cd(1)-O(4)          | 2.313(4)   | Cd(1)-C(16)          | 2.664(5)   |
| Cd(1)-O(3)          | 2.354(4)   | Cd(1)-C(10)          | 2.745(5)   |
| Cd(1)-O(2)          | 2.460(4)   |                      |            |
| O(1)-Cd(1)-N(1)     | 100.04(18) | N(1)-Cd(1)-C(16)     | 139.35(19) |
| O(1)-Cd(1)-O(4)     | 98.78(15)  | O(4)-Cd(1)-C(16)     | 27.76(15)  |
| N(1)-Cd(1)-O(4)     | 159.52(18) | O(3)-Cd(1)-C(16)     | 28.42(15)  |
| O(1)-Cd(1)-O(3)     | 132.10(15) | O(2)-Cd(1)-C(16)     | 80.25(15)  |
| N(1)-Cd(1)-O(3)     | 114.41(17) | O(2)#1-Cd(1)-C(16)   | 119.69(14) |
| O(4)-Cd(1)-O(3)     | 56.09(13)  | O(3)#2-Cd(1)-C(16)   | 88.82(14)  |
| O(1)-Cd(1)-O(2)     | 129.93(14) | O(1)-Cd(1)-C(10)     | 26.99(16)  |
| N(1)-Cd(1)-O(2)     | 83.78(17)  | N(1)-Cd(1)-C(10)     | 96.16(18)  |
| O(4)-Cd(1)-O(2)     | 77.96(14)  | O(4)-Cd(1)-C(10)     | 96.95(15)  |
| O(3)-Cd(1)-O(2)     | 87.65(15)  | O(3)-Cd(1)-C(10)     | 148.66(15) |
| O(1)-Cd(1)-O(2)#1   | 54.04(14)  | O(2)-Cd(1)-C(10)     | 103.08(15) |
| N(1)-Cd(1)-O(2)#1   | 91.82(16)  | O(2)#1-Cd(1)-C(10)   | 27.06(15)  |
| O(4)-Cd(1)-O(2)#1   | 92.72(13)  | O(3)#2-Cd(1)-C(10)   | 108.10(14) |
| O(3)-Cd(1)-O(2)#1   | 147.56(13) | C(16)-Cd(1)-C(10)    | 123.77(16) |
| O(2)-Cd(1)-O(2)#1   | 76.05(14)  | C(10)-O(1)-Cd(1)     | 98.4(3)    |
| O(1)-Cd(1)-O(3)#2   | 81.76(13)  | C(10)#1-O(2)-Cd(1)   | 170.4(3)   |
| N(1)-Cd(1)-O(3)#2   | 85.21(15)  | C(10)#1-O(2)-Cd(1)#1 | 85.1(3)    |
| O(4)-Cd(1)-O(3)#2   | 105.47(13) | Cd(1)-O(2)-Cd(1)#1   | 103.95(14) |
| O(3)-Cd(1)-O(3)#2   | 69.71(14)  | C(16)-O(3)-Cd(1)     | 89.5(3)    |
| O(2)-Cd(1)-O(3)#2   | 147.84(12) | C(16)-O(3)-Cd(1)#2   | 126.9(4)   |
| O(2)#1-Cd(1)-O(3)#2 | 134.50(12) | Cd(1)-O(3)-Cd(1)#2   | 110.29(14) |
| O(1)-Cd(1)-C(16)    | 118.83(17) | C(16)-O(4)-Cd(1)     | 92.1(3)    |

#1 -x+2,-y+2,-z+1 #2 -x+1,-y+2,-z+1

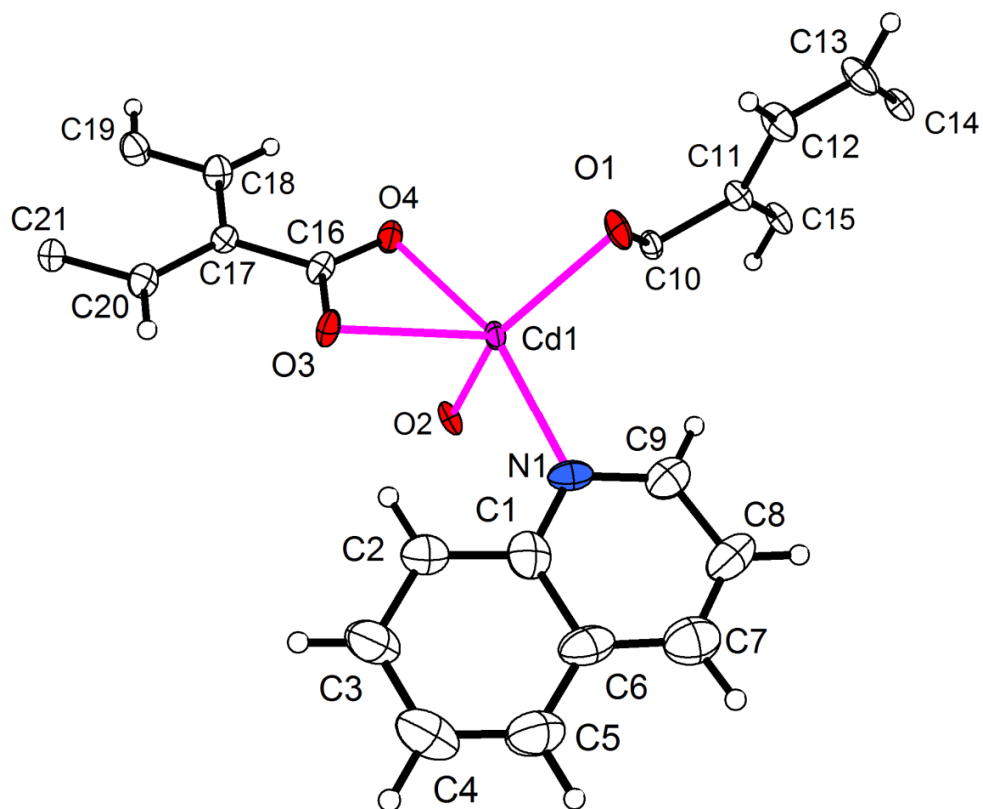

Fig . S1. Asymmetric unit

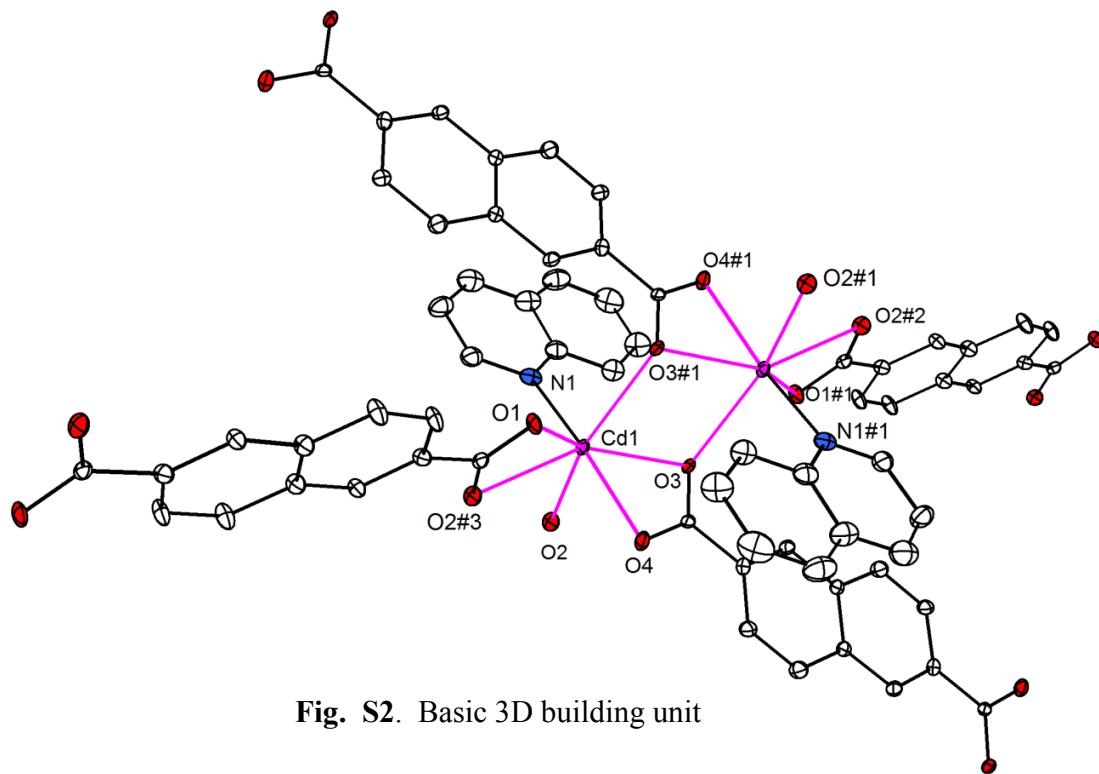

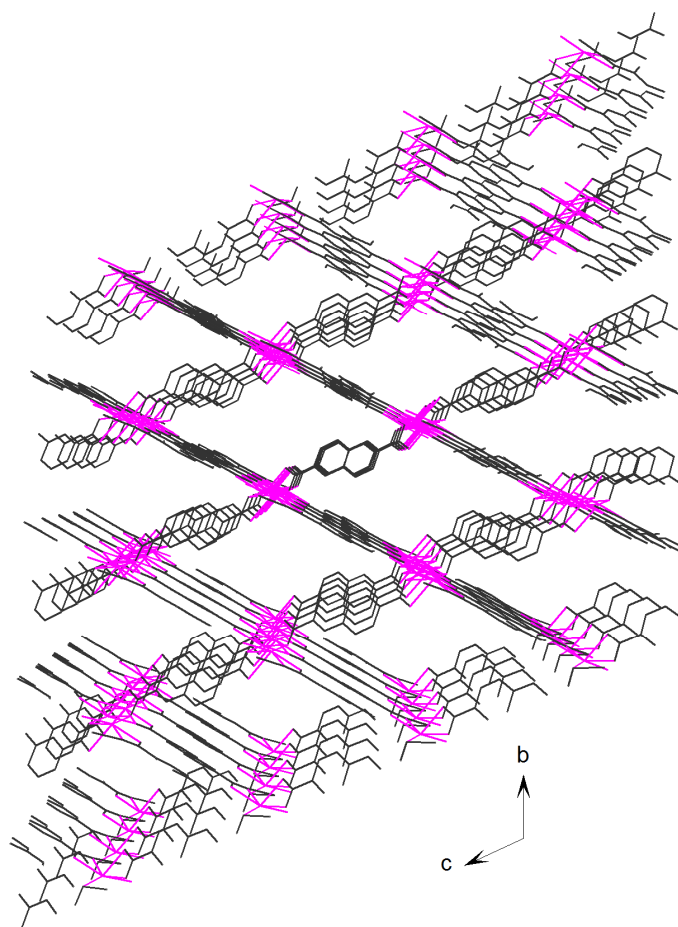

**Fig. S3.** 3D framework view along c axis. quinoline units have been omitted.



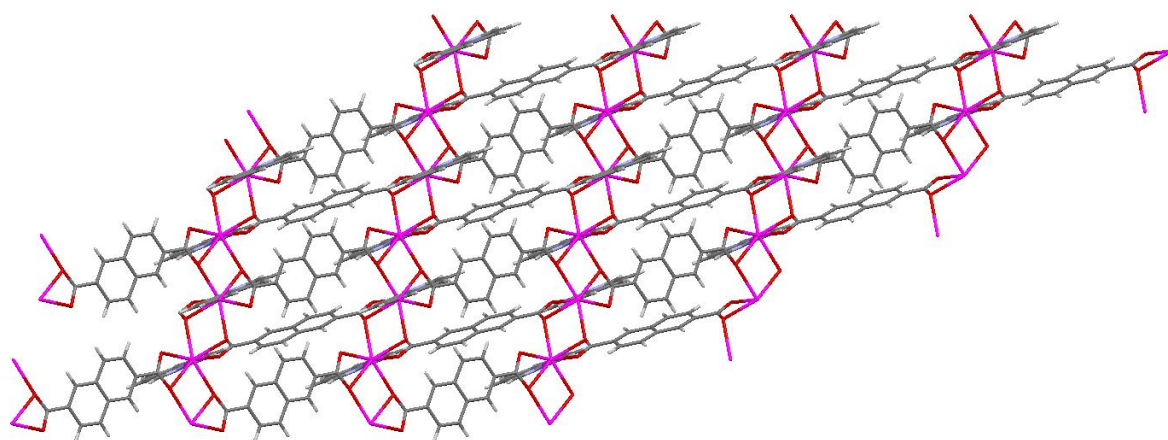

**Fig. S4.** View along b axis.

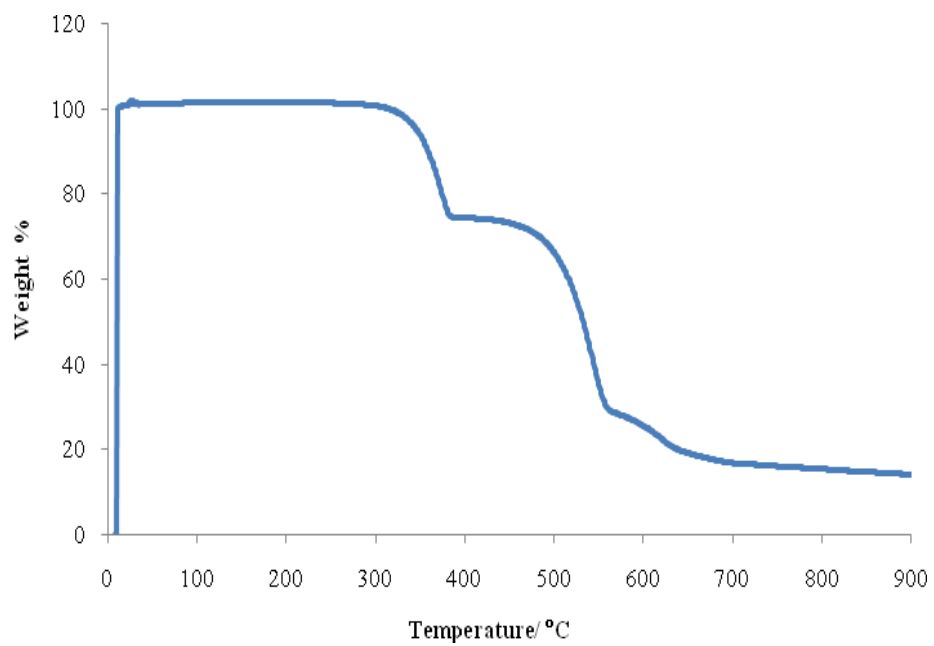

**Fig. S5.** Thermo gravimetric curve of **RAM 1** upto 1000 °C at heating rate of 10 °C/ min

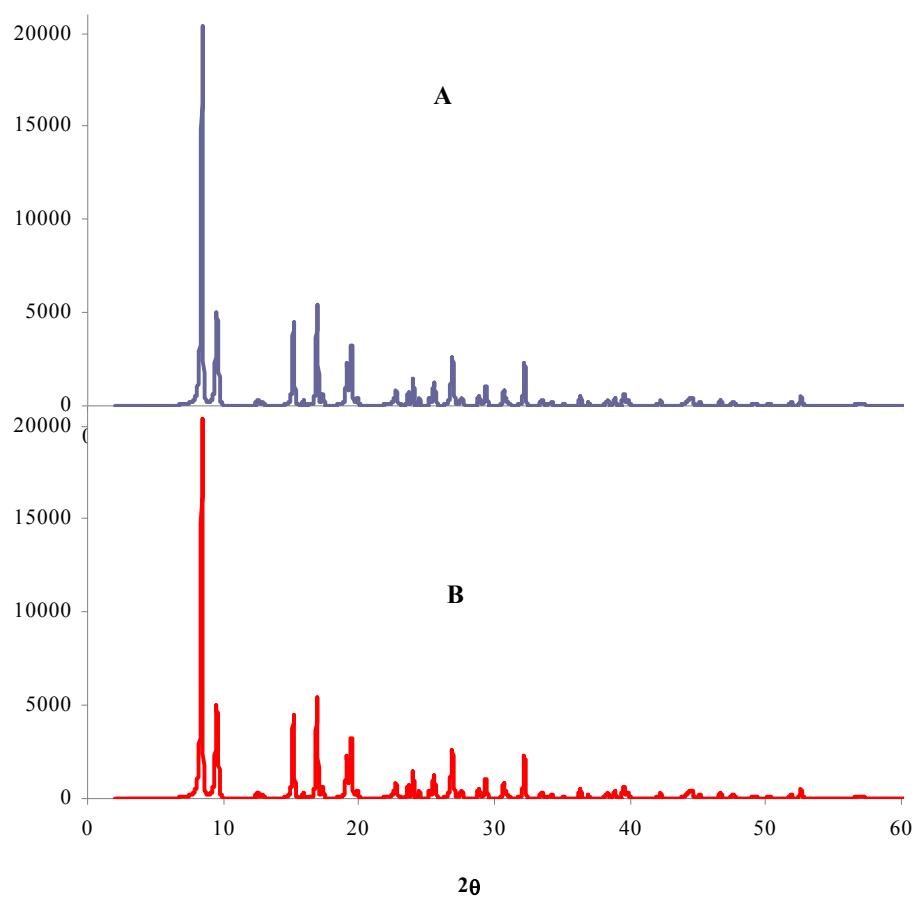

**Fig. S6.** (A) Powder X-ray diffraction of **RAM 1**. (B) Powder X-ray of **DRAM 1** at room temperature (The **DRAM 1** was ultra centrifuged and solid was collected which was used for the study).

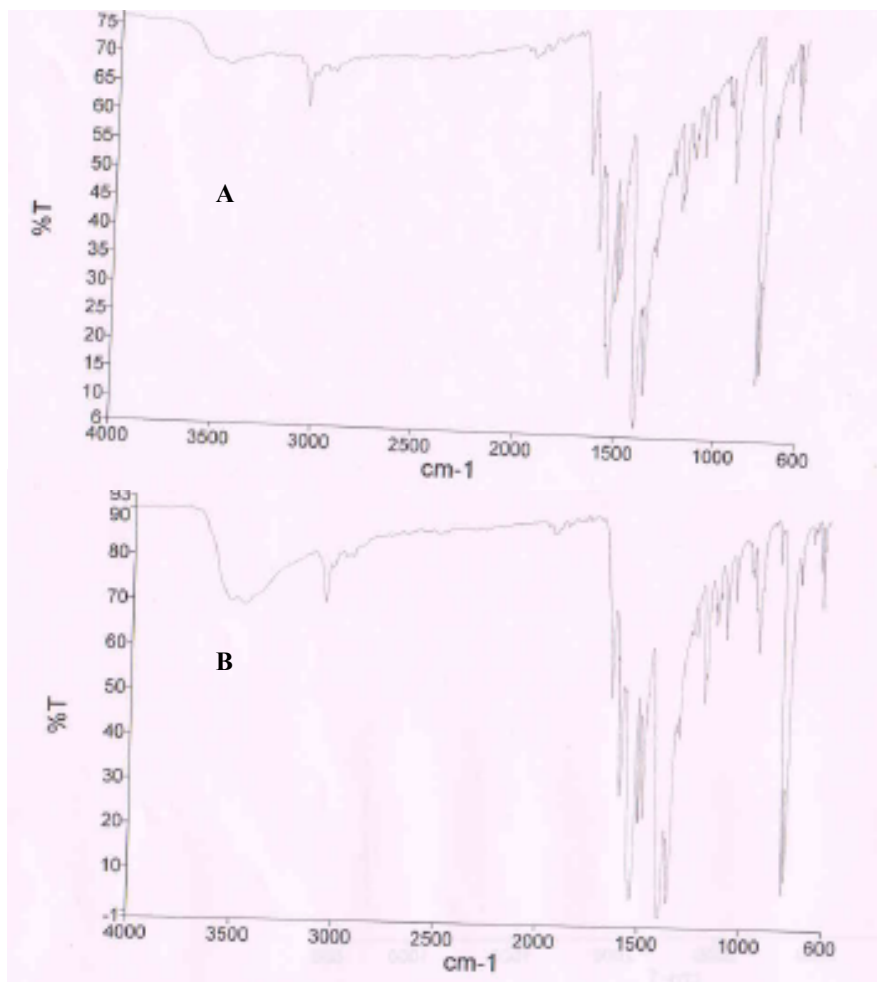

**Fig. S7.** (A) IR spectrum of **RAM 1**. (B) IR spectrum of **DRAM 1** using KBR pellets at room temperature (The **DRAM 1** was ultra centrifuged and solid was collected which was used for the study).

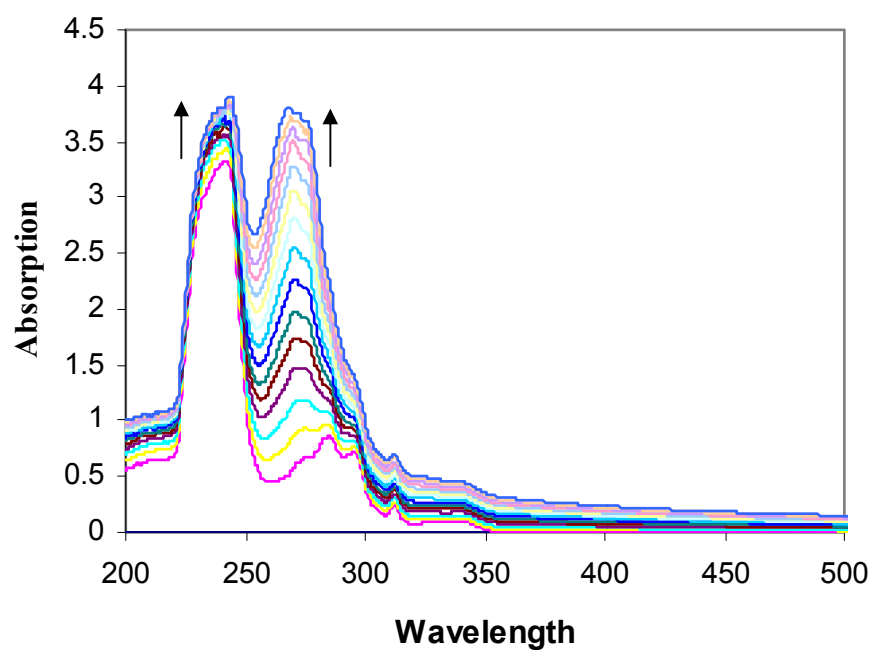

**Fig. S8.** UV-vis absorption spectra of **DRAM 1** on addition of **TP** (225  $\mu$ l) in  $H_2O$ ; pH = 7.4 buffered with HEPES.

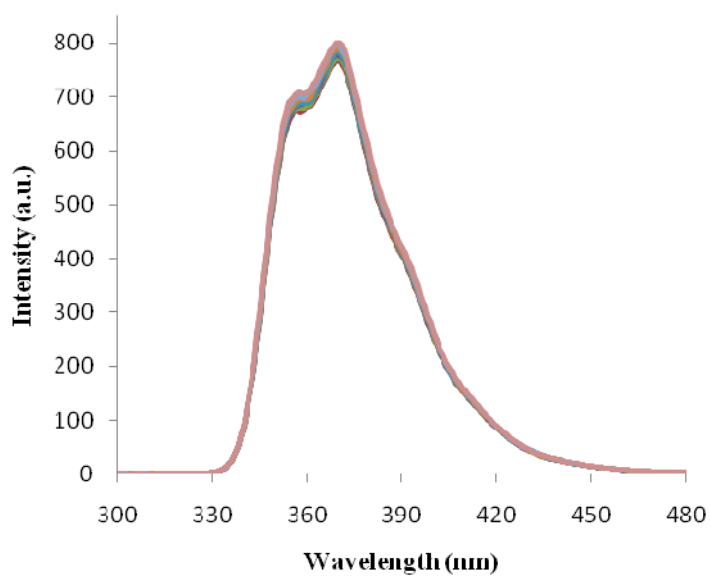

**Fig S9:** Fluorescence emission of **DRAM 1** on addition of 750  $\mu\text{L}$  (2 mg in 1 ml) of HSA,  $\lambda_{\text{ex}} = 243$  nm.
